# Supplementary material for: Demonstrating the use of UNSEEN climate data for hydrological applications: case studies for extreme floods and droughts in England
Source: Copernicus journal article supplement (doi:10.5194/nhess-2024-51), 2024-04-11
Supplement: Supplementary file 1 [file nhess-2024-51-supplement.pdf]

# Demonstrating the use of UNSEEN climate data for hydrological applications: case studies for extreme floods and droughts in England

Kay, Alison L<sup>1</sup>, Dunstone, Nick <sup>2</sup>, Kay, Gillian<sup>2</sup>, Bell, Victoria A<sup>1</sup>, Hannaford, Jamie<sup>1</sup>

<sup>1</sup>UK Centre for Ecology & Hydrology, Wallingford, UK, OX10 8BB

<sup>2</sup>Met Office, Exeter, UK, EX1 3PB

Correspondence to: A Kay ([alkay@ceh.ac.uk](mailto:alkay@ceh.ac.uk))

## Supplementary Material

Maps of the monthly precipitation bias-correction factors are shown in Figure S2 for the May-initialised UNSEEN GCM ensemble and **Error! Reference source not found.** for the Nov-initialised UNSEEN ensemble. The factors are often less than 1 in the south/east (indicating that GCM precipitation is too high) and greater than 1 in the north/west (indicating that GCM precipitation is too low). In late summer/early autumn the factors are greater than 1 for almost all of the GCM grid boxes.

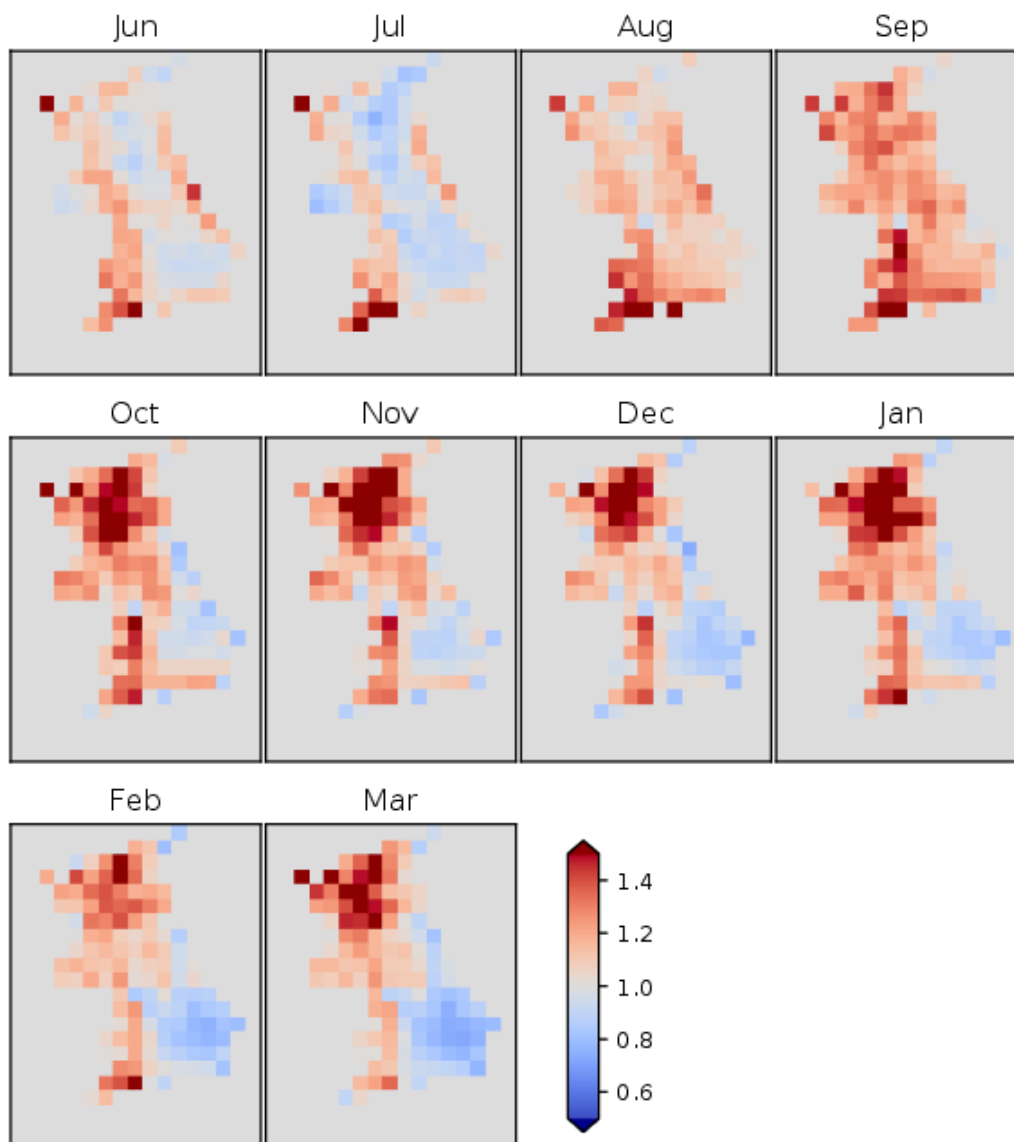

Figure S1 Correction grids for the May-initialised UNSEEN ensemble.

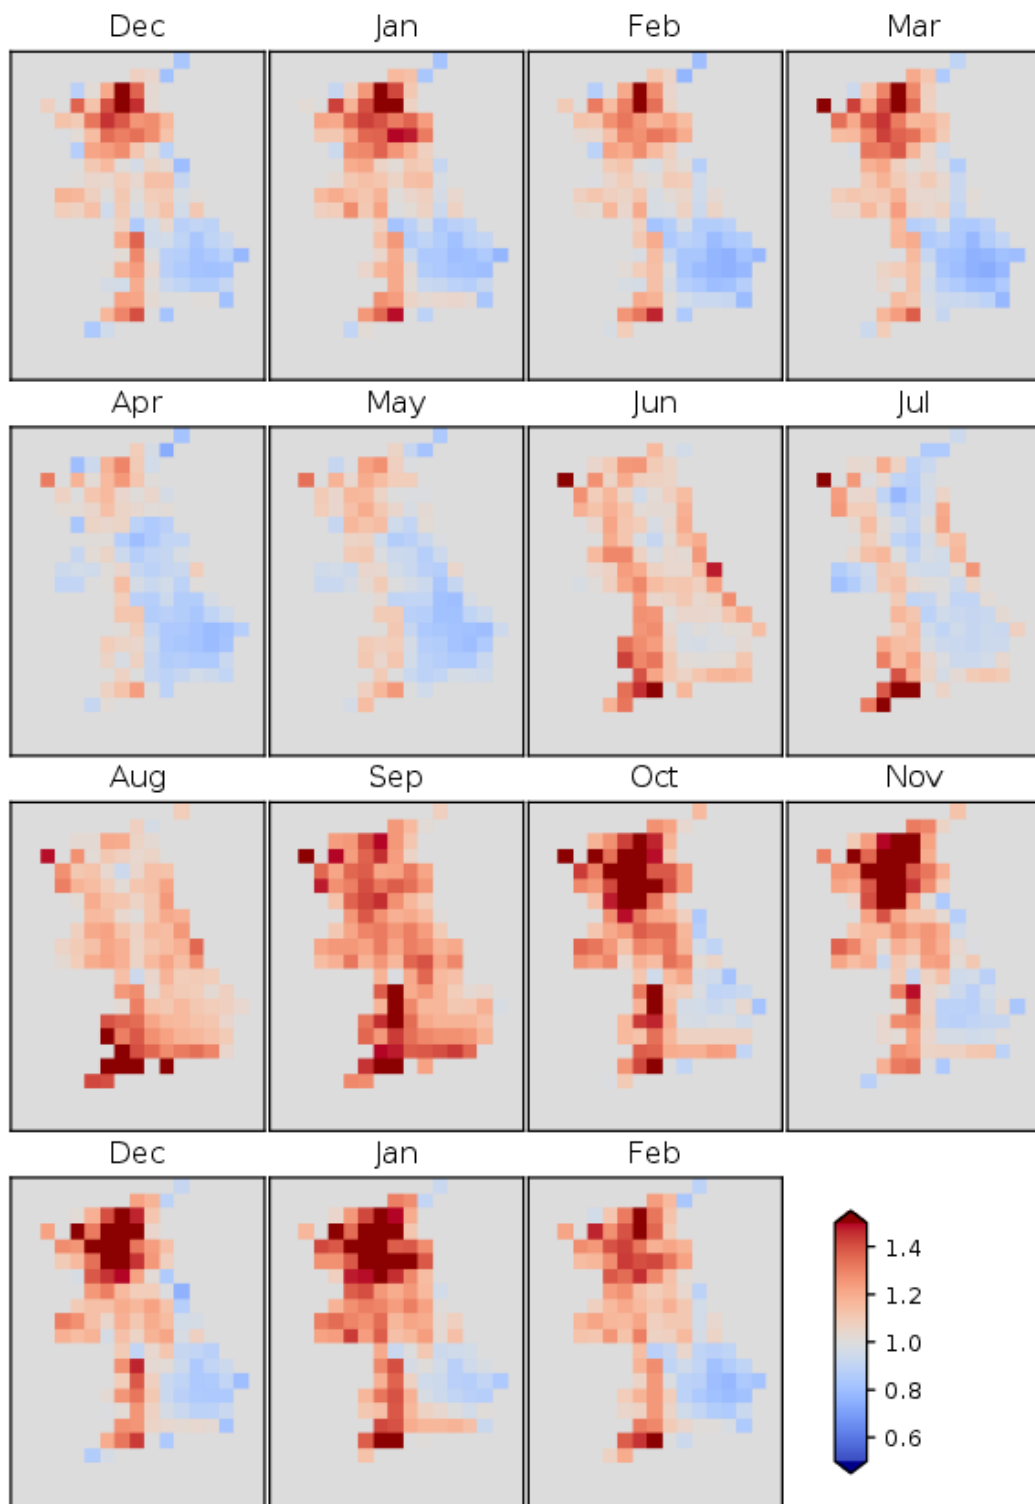

Figure S2 Correction grids for the Nov-initialised UNSEEN ensemble.
